## ERRATUM

### **Residual Neuromuscular Block in the Elderly: Incidence and Clinical Implications: Erratum**

In the article beginning on page 1322 of the December 2015 issue, table 5 was published with two extraneous columns of data. The columns on the right, with the headings “Difference (99% CI)” and “*P* Values,” should not have been included with the table.

#### **Reference**

Murphy GS, Szokol JW, Avram MJ, Greenberg SB, Shear TD, Vender JS, Parikh KN, Patel SS, Patel A: Residual neuromuscular block in the elderly: Incidence and clinical implications. *ANESTHESIOLOGY* 2015; 123:1322–36
